# Supplementary material for: 18F-Fluorothymidine-Pet Imaging of Glioblastoma Multiforme: Effects of Radiation Therapy on Radiotracer Uptake and Molecular Biomarker Patterns
Source: ScientificWorldJournal. 2013 Apr 4;2013:796029. doi: 10.1155/2013/796029 (PMC3649687; doi:10.1155/2013/796029)
Supplement: Supplementary file 1 — Figure 1: Changes in 18F-FLT flank tumor uptake seen at 1 and 2 weeks post-RT. [file 796029.f1.pdf]

**A.**

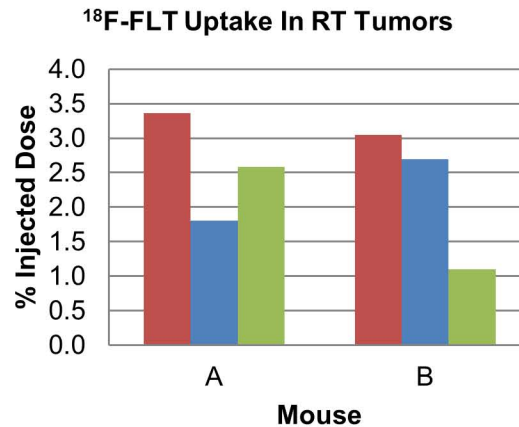

**B.**

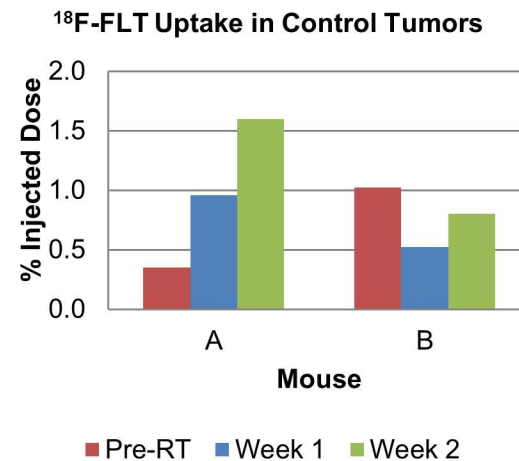

**Supplemental Figure 1.**  
**Changes in  $^{18}\text{F}$ -FLT**  
**flank tumor uptake**  
**seen at 1 and 2 weeks**  
**post-RT. (A) % ID of  $^{18}\text{F}$ -**  
**FLT uptake in RT tumors**  
**(n=2) pre-RT and 1 & 2**  
**weeks post-RT. Decrease**  
**in  $^{18}\text{F}$ -FLT uptake seen**  
**by 1 week and persists**  
**until 2 weeks. (B) % ID of**  
 **$^{18}\text{F}$ -FLT uptake in control**  
**tumors (n=2) pre-RT and**  
**1 & 2 weeks post-RT.**  
**Tumors show increase or**  
**minor decrease in % ID.**
